# Supplementary material for: Reevaluation of the BRCA2 truncating allele c.9976A > T (p.Lys3326Ter) in a familial breast cancer context
Source: PubMed Central journal article supplement (PMC4601142; doi:10.1038/srep14800), 2015-10-12
Supplement: srep14800-s1.pdf [file srep14800-s1.pdf]

**Reevaluation of the *BRCA2* truncating allele c.9976A>T (p.Lys3326Ter) in a familial breast cancer context.**

Ella R Thompson<sup>1</sup>, Kylie L Gorringer<sup>1,2,3</sup>, Simone M Rowley<sup>1</sup>, Na Li<sup>1,4</sup>, Simone McInerny<sup>5</sup>, Michelle W Wong-Brown<sup>6</sup>, Lisa Devereux<sup>1,7</sup>, Jason Li<sup>8</sup>, Lifepool Investigators<sup>7</sup>, Alison H Trainer<sup>1,5</sup>, Gillian Mitchell<sup>5</sup>, Rodney J Scott<sup>6,9</sup>, Paul A James<sup>2,3,5</sup>, Ian G Campbell<sup>1,2,3</sup>

<sup>1</sup>Cancer Genetics Laboratory, Peter MacCallum Cancer Centre, East Melbourne, Victoria, Australia. <sup>2</sup>Department of Pathology and <sup>3</sup>Sir Peter MacCallum Department of Oncology, University of Melbourne, Melbourne, Victoria, Australia. <sup>4</sup>Cancer Biology Research Center, Tongji Hospital, Tongji Medical College, Huazhong University of Science and Technology, Wuhan, Hubei, China. <sup>5</sup>Familial Cancer Centre, Peter MacCallum Cancer Centre, East Melbourne, Victoria, Australia.

<sup>6</sup>Discipline of Medical Genetics and Centre for Information-Based Medicine, The University of Newcastle and Hunter Medical Research Institute, Newcastle, Australia.

<sup>7</sup>Lifepool, Peter MacCallum Cancer Centre, East Melbourne, Victoria, Australia.

<sup>8</sup>Bioinformatics Core Facility, Peter MacCallum Cancer Centre, East Melbourne, Victoria, Australia. <sup>9</sup>Division of Genetics, Hunter Area Pathology Service, Newcastle, Australia.

## Supplementary Tables 1-3. Details of carriers.

### 1. HAPS cases with rs1157833

| Case        | Age of diagnosis | Cancer type      | Family history 1st degree      | Family history 2nd/3rd degree |
|-------------|------------------|------------------|--------------------------------|-------------------------------|
| HAPS-100240 | 48               |                  | Breast                         | AML, ovarian                  |
| HAPS-100265 | 43               |                  | Breast                         | Breast                        |
| HAPS-100356 | 67               |                  | Breast                         | Breast, ovarian, pancreatic   |
| HAPS-100468 | 57               |                  |                                | Ovarian, colorectal           |
| HAPS-100556 | 43               | Breast           | -                              |                               |
| HAPS-100699 |                  |                  |                                |                               |
| HAPS-101410 | 53               |                  | Breast, colorectal             | Prostate, endometrial         |
| HAPS-101870 |                  |                  | -                              |                               |
| HAPS-102557 |                  |                  | Breast                         |                               |
| HAPS-110368 |                  |                  |                                |                               |
| HAPS-111476 |                  |                  | Strong family history          |                               |
| HAPS-112654 | 62               | Breast           | Colorectal, prostate, lymphoma |                               |
| HAPS-113784 |                  |                  | -                              |                               |
| HAPS-113873 | 60               | Breast           | Colorectal, Oesophageal        | Breast                        |
| HAPS-113981 | 57               | Ovarian          |                                | Breast                        |
| HAPS-120274 | 56, 63           |                  |                                | Breast                        |
| HAPS-120625 | 31, 54           | Bilateral breast | -                              |                               |
| HAPS-120996 | 55               |                  | Cervical, prostate, bladder    | Lung, colorectal, cervical    |
| HAPS-121334 | 36, 48           | Bilateral breast | Glioblastoma, Cancer NOS       | Breast                        |
| HAPS-80021  | 36               | Breast           |                                | Ovarian                       |
| HAPS-81700  | 51, 60           | Bilateral breast | Breast                         |                               |
| HAPS-90359  | 57               |                  | Prostate, breast               | Breast                        |
| HAPS-90833  | 46               | Ovarian          | Lung                           | Colorectal                    |
| HAPS-92185  |                  |                  |                                |                               |

### 2. FCC cases with rs1157833

| Case         | Age at diagnosis | Cancer Type   | Family history 1st degree  | Family history 2nd degree         |
|--------------|------------------|---------------|----------------------------|-----------------------------------|
| FCC-1693-000 | 42               | Breast        | Breast, other              | Other                             |
| FCC-1858-000 | 28, 28           | Breast        | Bowel, other x3            | Other                             |
| FCC-2086-000 | 66               | Breast        | Breast x2, Bowel           | Lung                              |
| FCC-2089-000 | 38               | Breast        | Other                      | Breast, Lung, Other               |
| FCC-210-000  | 38               | Breast        | Breast/Bowel (same person) | Breast                            |
| FCC-2165-000 | 36               | Breast        | .                          | Lung                              |
| FCC-2384-000 | 40,46            | Breast        | Breast/Bowel (same person) | Bowel x2, Other x3                |
| FCC-2432-000 | 56               | Breast        | Breast, Ovarian, Prostate  | Breast                            |
| FCC-2626-000 | 42               | Breast        | Bowel, other               | Breast, Bowel x2, Other x4        |
| FCC-280-000  | 53, 54           | Breast, Ovary | Breast, Prostate           | Lung, Other                       |
| FCC-2838-000 | 47,53            | Breast        | Otherx3                    | Prostate                          |
| FCC-2876-000 | 38               | Breast        | .                          | Breast, Lung                      |
| FCC-3083-000 | 36               | Breast        | .                          | Breast, Bowel, Prostate, Other x3 |
| FCC-3119-000 | 32               | Breast        | .                          | Ovarian, Other                    |
| FCC-316-000  | 42               | Breast        | Breast x2                  | Breast x3                         |
| FCC-3192-000 | 52               | Breast        | Breast, Other              | Breast                            |

|              |            |                  |                         |                                         |
|--------------|------------|------------------|-------------------------|-----------------------------------------|
| FCC-3275-000 | 50,58, unk | Breast x2, Bowel | Other x2                | Breast x2, Bowel x2, Prostate, Other x3 |
| FCC-3278-000 | 62         | Breast           | Prostate                | Lung                                    |
| FCC-3294-000 | 33         | Breast           | .                       | Other x2                                |
| FCC-3364-000 | 27         | Breast           | .                       | Other x2                                |
| FCC-3565-000 | 28         | Breast           | Other                   | Breast x3, Lung, Other                  |
| FCC-3870-000 | 29         | Breast           | Other                   | Other x2                                |
| FCC-907-000  | 48         | Breast           | Breast, other           | Breast, Bowel, Other x2                 |
| FCC-581-000  | 52         | Breast           | Breast, Bowel           | .                                       |
| FCC-551-000  | 52         | Breast           | Breast                  | Other x2                                |
| FCC-1358-000 | 43         | Breast           | Breast x2, Bowel        | Other                                   |
| FCC-260-000  | 42         | Breast           | Breast                  | Lung, Other                             |
| FCC-1039-000 | 49         | Breast           | Breast, Prostate        | Bowel                                   |
| FCC-526-000  | 54         | Breast           | Breast, Bowel           | Breast, Bowel                           |
| FCC-616-000  | 37         | Breast           | .                       | Bowel, Other x3                         |
| FCC-1016-000 | 33         | Breast           | Breast                  | Lung, Bowel, Other x2                   |
| FCC-1063-000 | 48         | Breast           | Ovarian, Bowel          | Breast x2                               |
| FCC-624-000  | 40         | Breast           | Breast, Bowel, Prostate | Prostate x2, Other x2                   |
| FCC-300-000  | 44         | Breast           | Other                   | Prostate, Other x3                      |
| FCC-1114-000 | 44         | Breast           | Breast                  | .                                       |
| FCC-589-000  | 38         | Breast           | Other                   | Breast/Lung, Lung                       |
| FCC-1515-000 | 42         | Breast           | Breast x2               | Breast                                  |
| FCC-186-000  | 56         | Breast           | Breast x2, Bowel x2     | .                                       |
| FCC-656-000  | 41         | Breast           | Other                   | .                                       |
| FCC-1115-000 | 44         | Breast           | .                       | Breast, Other                           |
| FCC-1268-000 | 61         | Breast           | Breast, Other           | Ovarian                                 |
| FCC-2453-000 | 34         | Breast           | .                       | Breast, Other                           |

### 3. Controls with rs1157833

| Controls           | Age | Family history 1st degree            | Family history 2nd degree |
|--------------------|-----|--------------------------------------|---------------------------|
| LP-12048272        | 49  | Colorectal                           | Other                     |
| LP-12052032        | 55  | N                                    | <b>Breast</b> , Other     |
| LP-12052841        | 50  | N                                    | N                         |
| LP-12053358        | 51  | <b>Breast</b> , Colorectal, Prostate | <b>Breast</b>             |
| LP-12053724        | 68  | Other                                | <b>Breast</b>             |
| LP-13000214        | 72  | N                                    | N                         |
| LP-13027406        | 55  | N                                    | Other                     |
| LP-13036592 *homoz | 49  | <b>Breast</b>                        | Other                     |
| LP-13041356        | 81  | Other                                | Other                     |
| LP-13090810        | 52  | <b>Ovarian</b> , Prostate            | NA                        |
| LP-13100510        | 49  | <b>Breast</b>                        | NA                        |
| LP-11000316        | 76  | Testicular, Melanoma                 | Other                     |
| LP-11000415        | 47  | <b>Breast</b>                        | <b>Breast</b> , Other     |
| LP-12003580        | 80  | Colorectal                           | N                         |

|             |    |                |                      |
|-------------|----|----------------|----------------------|
| LP-11000799 | 71 | <b>Breast</b>  | <b>Breast, Other</b> |
| LP-12005688 | 64 | Lung, Other    | N                    |
| LP-12003677 | 63 | Colorectal     | Other                |
| LP-12000264 | 72 | N              | Other                |
| LP-12006186 | 59 | N              | N                    |
| LP-12010562 | 51 | <b>Ovarian</b> | <b>Breast</b>        |
| LP-12007674 | 62 | Lung, Other    | Other                |
| LP-12009531 | 71 | <b>Breast</b>  | <b>Breast</b>        |
| LP-12011226 | 65 | N              | <b>Breast, Other</b> |
| LP-12007515 | 49 | N              | Other                |
| LP-12009764 | 66 | N              | N                    |
| LP-12010367 | 76 | Prostate       | Other                |
| LP-11000229 | 66 | Prostate       | N                    |
| LP-10000188 | 56 | N              | <b>Breast</b>        |
| LP-12031819 | 65 | N              | <b>Breast, Other</b> |
| LP-13039185 | 52 | N              | Colorectal, Other    |
| LP-13081169 | 51 | N              | Other                |
| LP-13067508 | 62 | Other          | <b>Breast</b>        |
| LP-13231021 | 59 | N              | N                    |
